# Supplementary material
Source: Springer Nature journal article supplement (https://www.springermedizin.de/resource/supplementary/12879_2012_1899_MOESM2_ESM.pdf/9444006)

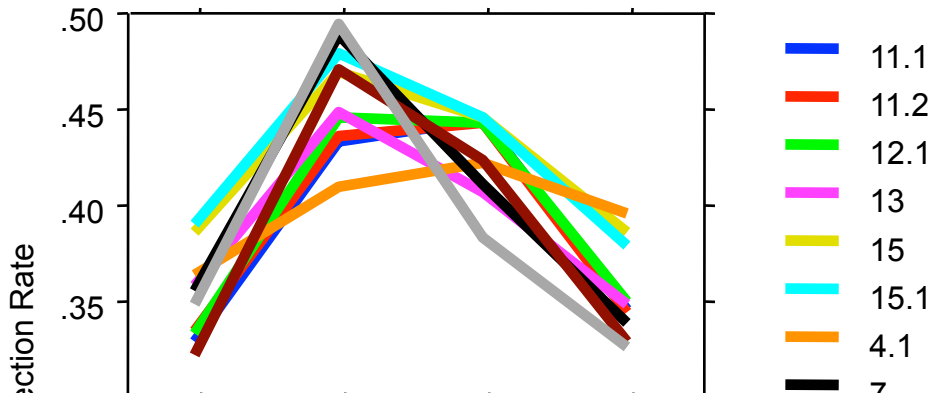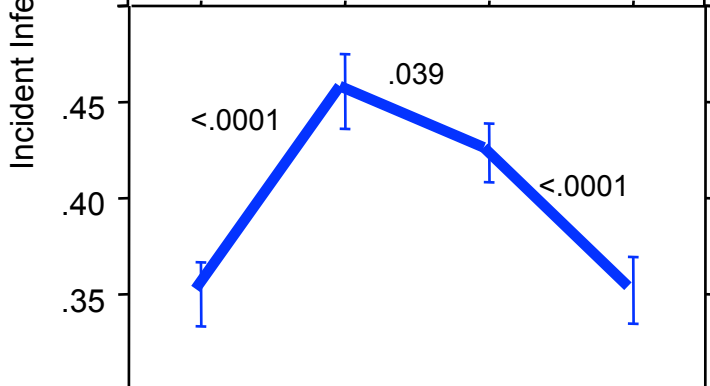

| Cohort Year | A      | B    | C    | D    |
|-------------|--------|------|------|------|
| Year        | 2005/6 | 2008 | 2009 | 2010 |

|          |           |           |           |           |
|----------|-----------|-----------|-----------|-----------|
| Mean IIR | .345      | .449      | .414      | .347      |
| 95% CI   | .330-.360 | .432-.466 | .405-.433 | .332-.363 |

|               |     |       |       |       |
|---------------|-----|-------|-------|-------|
| % of baseline | 100 | 130.6 | 121.9 | 100.7 |
|---------------|-----|-------|-------|-------|

Supplement: MOESM2 [file 9444006]
